# Supplementary material for: Astaxanthin Inhibits Autophagic Cell Death Induced by Bisphenol A in Human Dermal Fibroblasts
Source: MDPI journal article supplement (doi:10.3390/antiox10081273), 2021-08-11
Supplement: s1 [file s1]

## Supplementary data

### Astaxanthin Inhibits Autophagic Cell Death Induced by Bisphenol A in Human Dermal Fibroblasts

Seong-Ryeong Lim <sup>1</sup>, Do-Wan Kim <sup>1</sup>, Junghee Sung <sup>2</sup>, Tae Hoon Kim <sup>3</sup>,  
Chang-Hyung Choi <sup>4,\*</sup> and Sei-Jung Lee <sup>1,\*</sup>

<sup>1</sup> *Department of Pharmaceutical Engineering, Daegu Haany University, Gyeongsan 38610, South Korea*

<sup>2</sup> *Research Center, Reanzen Co. Ltd., Anyang 14056, South Korea*

<sup>3</sup> *FoodyWorm Inc., Yancheongsongdae-gil 10, Ochang-eup, Cheongwon-gu, Choenju-si 28118, South Korea;*

<sup>4</sup> *Division of Cosmetic Science and Technology, Daegu Haany University, Gyeongsan 38610, South Korea*

**\* Corresponding authors:** Sei-Jung Lee Ph.D. and Chang-Hyung Choi, Ph.D.

Department of Pharmaceutical Engineering, Daegu Haany University

Gyeongsan 38610, South Korea

E-mail: sjlee@dhu.ac.kr; Tel: 82-54-819-1806; Fax: 82-54-819-1406

**Table S1.** PCR primer sequences

| <b>Gene</b>    | <b>Identification</b> | <b>Primer sequence, 5'-3'</b>  |
|----------------|-----------------------|--------------------------------|
| ULK1           | Forward               | CAGAACTACCAGCGCATTGA           |
|                | Reverse               | TCCACCCAGAGACATCTTCC           |
| ULK2           | Forward               | CTCCTCAGGTTCTCCAGTGC           |
|                | Reverse               | TTGGTGGGAGAAGTTCCAAG           |
| Vps34          | Forward               | ATGTGTATGGTCCCGGAAAA           |
|                | Reverse               | TGTCGATGAGCTTTGGTGAG           |
| Atg14          | Forward               | TCACCATCCAGGAACTCACA           |
|                | Reverse               | TTCAGTCTTCGGCTGAGGTT           |
| Beclin-1       | Forward               | GCCCTTTGAAGTACGAGCAG           |
|                | Reverse               | GAGATCATCCCACCTGCACT           |
| Atg5           | Forward               | CGGGAACACCAAGTTTCACT           |
|                | Reverse               | TCTGGGGAGACATCCGTAAG           |
| Atg12          | Forward               | TGGGATTGCAAAATGACAGA           |
|                | Reverse               | TTCCCCATCTTCAGGATCAA           |
| Atg16L1        | Forward               | GTCTTCGATGCACATGATGG           |
|                | Reverse               | GATTCGGCTTGCAAAATCAT           |
| LC3-II         | Forward               | AGCAGCATCCAACCAAAATC           |
|                | Reverse               | CTGTGTCCGTTACCAACAG            |
| Rab7           | Forward               | CTGACCAAGGAGGTGATGGT           |
|                | Reverse               | CTGGCCTGGATGAGAACTC            |
| FYCO1          | Forward               | GGAGCTAGGAGCAGCAGAGA           |
|                | Reverse               | CGCATCACTGGGAATAGGTT           |
| LAMP1          | Forward               | CTTCAGCAGGGGAGAGACAC           |
|                | Reverse               | TGTTGGGGTTGATGTTGAGA           |
| LAMP2          | Forward               | GGTTAATGGCTCCGTTTCA            |
|                | Reverse               | ATGGGCACAAGGAAGTTGTC           |
| $\beta$ -actin | Forward               | AACCGCGAGAAGATGACCCAGATCATGTTT |
|                | Reverse               | AGCAGCCGTGGCCATCTCTTGCTCGAAGTC |

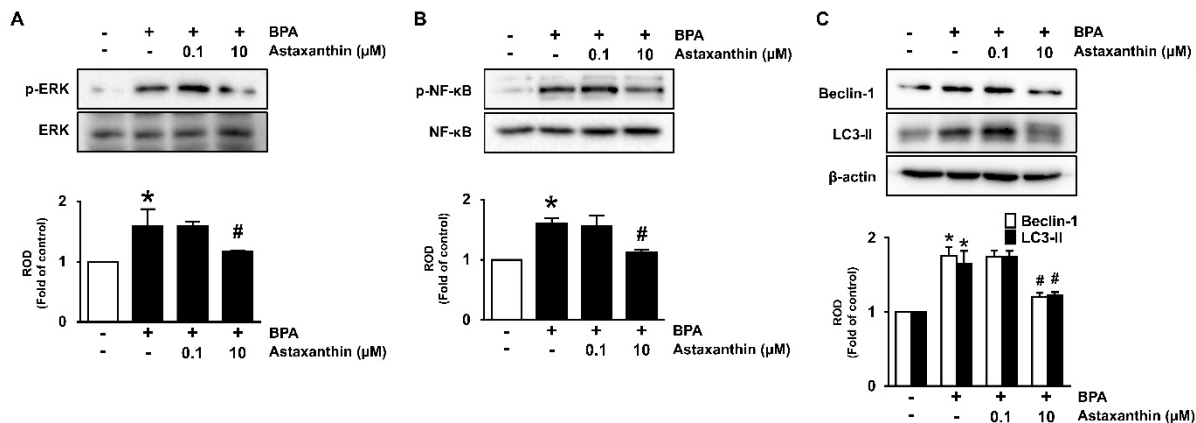

**Figure S1.** Dose-dependent responses of astaxanthin on the level of autophagy-related proteins in BPA-treated NHDF are shown. The effects of astaxanthin (0.1 and 10 μM) on the phosphorylation of ERK (**A**) and NF-κB (**B**), and the expression of Beclin-1 and LC3-II (**C**) are shown. \*  $p \leq 0.05$  versus control, #  $p \leq 0.001$  versus BPA alone.  $n = 3$ . ROD, relative optical density.
